# Supplementary material for: Early experience with tixagevimab/cilgavimab pre-exposure prophylaxis in patients with immune-mediated inflammatory disease undergoing B cell depleting therapy and those with inborn errors of humoral immunity
Source: HighWire-hosted journal article supplement (doi:10.1136/rmdopen-2022-002557), 2022-09-01
Supplement: rmdopen-2022-002557supp001_data_supplement.pdf [file rmdopen-2022-002557supp001_data_supplement.pdf]

**Supplemental File - COVID-19 outcomes and treatment**

| <b>NIH COVID-19 ordinal scale<sup>1</sup></b>               | <b>Mild<sup>2</sup></b><br>Score 1-3 | <b>Moderate</b><br>Score 4-5 | <b>Severe<sup>3</sup></b><br>Score 6-8 |
|-------------------------------------------------------------|--------------------------------------|------------------------------|----------------------------------------|
| <b>All patients</b>                                         | 11                                   | 0                            | 1                                      |
| <b>Patients who received COVID-19 treatment<sup>¶</sup></b> | 9                                    | 0                            | 0                                      |
| <b>Monoclonals*</b>                                         | 8                                    | 0                            | 0                                      |
| <b>Oral antivirals<sup>+</sup></b>                          | 2                                    | 0                            | 0                                      |

<sup>1</sup>National Institutes of Health (NIH) COVID-19 ordinal scale: 1) Not hospitalized and no limitations of activities

2) Not hospitalized, with limitation of activities, home oxygen (O<sub>2</sub>) requirement, or both

3) Hospitalized, not requiring supplemental O<sub>2</sub> and no longer requiring ongoing medical care

4) Hospitalized, not requiring supplemental O<sub>2</sub> but requiring ongoing medical care

5) Hospitalized, requiring any supplemental O<sub>2</sub>

6) Hospitalized, requiring noninvasive ventilation or use of high-flow O<sub>2</sub> devices

7) Hospitalized, receiving invasive mechanical ventilation or extracorporeal membrane oxygenation

8) Death

<sup>2</sup>Score 1 = 5 patients, Score 2 = 6 patients

<sup>3</sup>Score 6 = 1 patient

<sup>¶</sup>1 patient received both a monoclonal infusion and oral treatment

\*7 Bebtelovimab, 1 sotrovimab

+ Nirmatrelvir/ritonavir
